# Supplementary material for: Real-time detection of SARS-CoV-2 in clinical samples via ultrafast ligation-dependent RNA transcription amplification
Source: Royal Society of Chemistry journal article supplement (doi:10.1039/d3ay00093a), 2023-01-01
Supplement: d3ay00093a1.pdf [file d3ay00093a1.pdf]

## **Real-time detection of SARS-CoV-2 in clinical samples via ultrafast ligation-dependent RNA transcription amplification**

Peng Zhang ‡,<sup>a</sup> Yang Li ‡,<sup>a</sup> Dongmei Zhang <sup>c</sup>, Xinghao Zhu <sup>a</sup>, Jinling Guo <sup>a</sup>, Cuiping Ma <sup>b</sup>, Chao Shi <sup>\*,a</sup>

<sup>a</sup> *Qingdao Nucleic Acid Rapid Testing International Science and Technology Cooperation Base, College of Life Sciences; Department of Pathogenic Biology, School of Basic Medicine; Department of Clinical Laboratory, the Affiliated Hospital of Qingdao University, Qingdao University, Qingdao, 266071, PR China.*

<sup>b</sup> *Shandong Provincial Key Laboratory of Biochemical Engineering, Qingdao Nucleic Acid Rapid Detection Engineering Research Center, College of Marine Science and Biological Engineering, Qingdao University of Science and Technology, Qingdao, 266042, PR China.*

<sup>c</sup> *Qingdao special servicemen recuperation center of PLA navy, Qingdao, 266071, PR China.*

\* To whom correspondence should be addressed.

‡ These two authors contributed equally to this work.

Tel (Fax): +86-532-85955399

E-mail: sc169@163.com

## Supplementary Information

**Table S1. Sequences of nucleic acids used in this work**

| Name                                                                                         | Sequence (5'-3')                                                                                 |
|----------------------------------------------------------------------------------------------|--------------------------------------------------------------------------------------------------|
| Promoter probe                                                                               | <sup>a</sup> AACACTATTAGCATAAGCAGTTGTGCCCTATAGTGAGTCGTATTAGG<br>AAGG                             |
| Reporter probe                                                                               | <sup>b</sup> TCGACCTAGCATATCCATGATATCTGTTAGTTTTTTTCTGAAAGACC<br>GCCGGACAAGTGACAGCTTGACAAATGTTAAA |
| Reporter probe<br>(no terminator)                                                            | CCGCCGGACAAGTGACAGCTTGACAAATGTTAAA                                                               |
| T7 promoter                                                                                  | 20-nt TAATACGACTCACTATAGGG                                                                       |
|                                                                                              | 22-nt CCTAATACGACTCACTATAGGG                                                                     |
|                                                                                              | 24-nt TTCCTAATACGACTCACTATAGGG                                                                   |
|                                                                                              | 26-nt CCTTCCTAATACGACTCACTATAGGG                                                                 |
| Molecular beacon                                                                             | MB1 FAM- CCGCCGGACAAGGAGGCTGGAGTCAACCGGCGG -DABCYL                                               |
|                                                                                              | MB2 FAM-AGTATACCTGCAGTGACTCTTAAGATCCAGGTATACT-DABCYL                                             |
|                                                                                              | MB3 FAM-ACCTTCTATAGCAAACACCATTGTCACACTCCACCTCAGCCTAT<br>AGAAGGT-DABCYL                           |
|                                                                                              | MB4 FAM-ACTATAGGTATACAACCTACTACCTCACCTATAGT-DABCYL                                               |
| qRT-PCR primer set<br>( <sup>c</sup> LR898678.2)                                             | F GTGATGTAGAAAACCCCTCACC                                                                         |
|                                                                                              | R AGCAAGAACAAGTGAGGC                                                                             |
| qRT-LAMP primer set<br>( <sup>c</sup> LR898678.2)                                            | F3 TGCTTCAGTCAGCTGATG                                                                            |
|                                                                                              | B3 TTAAATTGTCATCTTCGTCCTT                                                                        |
|                                                                                              | FIP TCAGTACTAGTGCCTGTGCCACAATCGTTTTTAAACGGGT                                                     |
|                                                                                              | BIP TCGTATACAGGGCTTTTGACATCTATCTTGGAAGCGACAACAA                                                  |
|                                                                                              | LF CTGCACTTACACCGCAA                                                                             |
|                                                                                              | LB GTAGCTGGTTTTGCTAAATTCC                                                                        |
| RNA fragment with SARS-CoV-2 <i>orf1ab</i> gene specific sequence ( <sup>c</sup> OQ117226.1) | AUGCCACAACUGCUUAUGCUAAUAGUGUUUUUAACAUUUGUCAAGC<br>UGUCACGGCC                                     |
| RNA fragment with SARS-CoV <i>orf1ab</i> gene specific sequence ( <sup>c</sup> MN312831.1)   | <sup>d</sup> AUGCUACAACUGCUUAUGCUAAUAGUGUCUUUAACAUUUGUCAAG<br>CUGUUACAGCC                        |

<sup>a</sup> Sequences marked in red and blue were the sequence complementary to the part of the target RNA and T7 promoter binding site, respectively.

<sup>b</sup> Sequences marked in orange, green, and red were the VSV terminator, the sequence consistent with the loop part of the MB, and the sequence complementary to the part of the target RNA, respectively.

<sup>c</sup> GenBank accession number.

<sup>d</sup> The portion in italic type represented the nucleotides variation compared to the RNA fragment with SARS-CoV-2 *orf1ab* gene specific sequence.

## Procedure of qRT-PCR and qRT-LAMP

The reaction system of qRT-PCR with a total volume of 20  $\mu\text{L}$  consists of 2  $\mu\text{L}$  sample, 0.4  $\mu\text{L}$  dNTPs (10 mM each), 0.8  $\mu\text{L}$  forward and backward primer (10  $\mu\text{M}$  each), 0.3  $\mu\text{L}$  *Taq* DNA polymerase (5 U/ $\mu\text{L}$ ), 1.3  $\mu\text{L}$  10 $\times$  *Taq* buffer, 0.5  $\mu\text{L}$  EvaGreen Dye, 0.2  $\mu\text{L}$  HiScript II Reverse Transcriptase (200 U/ $\mu\text{L}$ ), 1.3  $\mu\text{L}$  5 $\times$  HiScript II Buffer, 0.2  $\mu\text{L}$  Murine RNase inhibitor (40 U/ $\mu\text{L}$ ), 0.08  $\text{MgSO}_4$  solution (100 mM) and 12.12  $\mu\text{L}$  DEPC-treated water. The reaction procedure included reverse transcription at 55 $^\circ\text{C}$  for 5 min, denaturation at 95 $^\circ\text{C}$  for 3 min, and 40 cycles consisting of 95 $^\circ\text{C}$  for 10 s, and 58 $^\circ\text{C}$  for 15 s for amplification. qRT-LAMP was performed by adding 2.5  $\mu\text{L}$  sample, 4  $\mu\text{L}$  dNTPs (10 mM each), 1  $\mu\text{L}$  F3 and B3 (10  $\mu\text{M}$  each), 0.8  $\mu\text{L}$  FIP and BIP (100  $\mu\text{M}$  each), 0.4  $\mu\text{L}$  LF and LB (100  $\mu\text{M}$  each), 0.5  $\mu\text{L}$  *Bst* 2.0 WarmStart DNA polymerase (8000 U/mL), 2.5  $\mu\text{L}$  10 $\times$  ThermoPol reaction buffer, 0.5  $\mu\text{L}$   $\text{MgSO}_4$  solution (100 mM), 0.625  $\mu\text{L}$  EvaGreen Dye, 0.3  $\mu\text{L}$  HiScript II Reverse Transcriptase (200 U/ $\mu\text{L}$ ) and 11.875  $\mu\text{L}$  DEPC-treated water into a total volume of 25  $\mu\text{L}$  at 65 $^\circ\text{C}$  for 45 min. Both qRT-PCR and qRT-LAMP assays were carried out by a CFX Connect<sup>TM</sup> Real-Time PCR System (Bio-Rad, CA, USA). The fluorescence signal of the qRT-PCR was read after each thermal cycling, while that of the qRT-LAMP was monitored at 1-min intervals.

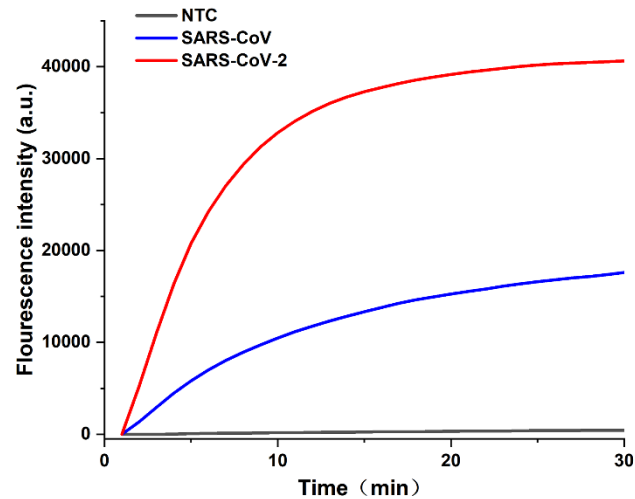

SARS-CoV-2 AUGCCACAACUGCUUAUGC<sup>*UAAUAGUGUUUUUAACA*</sup>UUUGUCAAGCUGUCACGGCC  
SARS-CoV AUGCUACAACUGCUUAUGC<sup>*UAAUAGUGU*</sup>CUUUUAACAUUUGUCAAGCUGUUACAGCC

**Fig.S1.** Capability of SCAN to distinguish RNA with similar sequence to the target. The concentration of the RNA fragments was 1  $\mu$ M. The portion in italic type represented the ligation site of the two probes (between the two nucleotides), while the variation nucleotides of the RNA fragment with SARS-CoV *orflab* gene specific sequence were marked in red. NTC represented no template control.
